# Supplementary material
Source: PubMed Central journal article supplement (PMC9314313)
Supplement: hei-2021-205-s001.pdf [file hei-2021-205-s001.pdf]

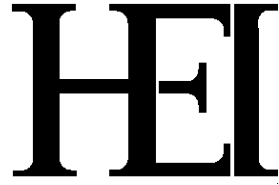

## APPENDICES AVAILABLE ON THE HEI WEBSITE

### Research Report 205

## Improvements in Air Quality and Health Outcomes Among California Medicaid Enrollees Due to Goods Movement Actions

Ying-Ying Meng et al.

### Appendix 1. Phase 1 Air Quality Improvements

### Appendix 2. LUR Modeling and Concentration Assessment

### Appendix 3. Improvements in Air Pollution Concentrations and Health Effects

These Appendices were reviewed solely for spelling, grammar, and cross-references to the main text. They have not been formatted or fully edited by HEI. This document was reviewed by the HEI Review Committee.

---

Correspondence may be addressed to Dr. Ying-Ying Meng, UCLA Center for Health Policy Research, University of California, Los Angeles, California; e-mail: [yymeng@ucla.edu](mailto:yymeng@ucla.edu).

Although this document was produced with partial funding by the United States Environmental Protection Agency under Assistance Award CR-83467701 to the Health Effects Institute, it has not been subjected to the Agency's peer and administrative review and therefore may not necessarily reflect the views of the Agency, and no official endorsement by it should be inferred. The contents of this document also have not been reviewed by private party institutions, including those that support the Health Effects Institute; therefore, it may not reflect the views or policies of these parties, and no endorsement by them should be inferred.

© 2021 Health Effects Institute, 75 Federal Street, Suite 1400, Boston, MA 02110

HEI Research Report 205 Meng Appendices (Available on the HEI Website)

---

## APPENDICES

---

### Appendix 1: PHASE I AIR QUALITY IMPROVEMENTS

#### Assessing Air Quality Improvements using Port Authority and SCAQMD Data

The project was designed to be conducted in two phases. During Phase I of the project (9/2012-12/2014), in the fall of 2012 and spring of 2013, we deployed two new rounds of Ogawa NO<sub>x</sub> fixed-site saturation monitors in the counties of Los Angeles and Alameda. Using previously collected Ogawa monitoring data for 2004-2005 (Alameda) and 2006-2007 (Los Angeles) and our newly collected 2012-2013 data (Alameda and Los Angeles), we have determined that improvements in air quality in GMCs are statistically significantly greater than in CTRLs after controlling for truck/vehicle kilometers traveled, cargo volume, meteorological conditions, and other factors.

Previous research suggested that we can expect to detect changes in health effects associated with air quality improvement measures when pollutant concentrations are reduced by a factor of 1.5 or greater (van Erp and Cohen 2009). From Phase I of our study, we found the annual average levels of PM<sub>2.5</sub> decreased from 14.5 to 9.4 µg m<sup>-3</sup> between 2007 to 2010 at the Long Beach Port; PM<sub>2.5</sub> concentrations decreased from 13.7 to 7.1 µg m<sup>-3</sup> in the source dominated Pier 300 station in the Los Angeles Port. The magnitude of reduction in PM<sub>2.5</sub> in neighborhoods around the Los Angeles and Long Beach Ports ranged from 1.5 to 1.7, making it highly likely that we will be able to identify improvements in common health conditions related to air pollution reduction. In addition, we used the Port of Los Angeles cargo volume and pollutant concentrations measured by the Southern California Air Quality Management District (SCAQMD) to compare trends. The purpose was to see whether decreases in air pollutant concentrations could be associated with the economic downturn, shown below by using cargo volume as an indicator. Cargo volumes were measured by twenty-foot equivalent units (TFEUs), a standardized maritime industry measurement used when counting cargo containers of varying lengths. Based on the monitoring data from SCAQMD, the mean NO<sub>x</sub> concentrations in GMCs decreased by over half, from 67.99 ppb in 2003 to 34.75 ppb in 2012, a reduction factor of 2.0 (Figure A1-1). Mean NO<sub>x</sub> concentrations in CTRLs decreased from 39.89 ppb in 2003 to 18.85 ppb in 2012, a reduction factor of 2.1. While Los Angeles Port cargo volume, shown at the top of the graphs below, demonstrated some fluctuations over the ten years, NO<sub>x</sub> concentration and port cargo volume trend lines are not similar, suggesting that decreases in NO<sub>x</sub> concentrations are not mainly related to changes in port cargo volume.

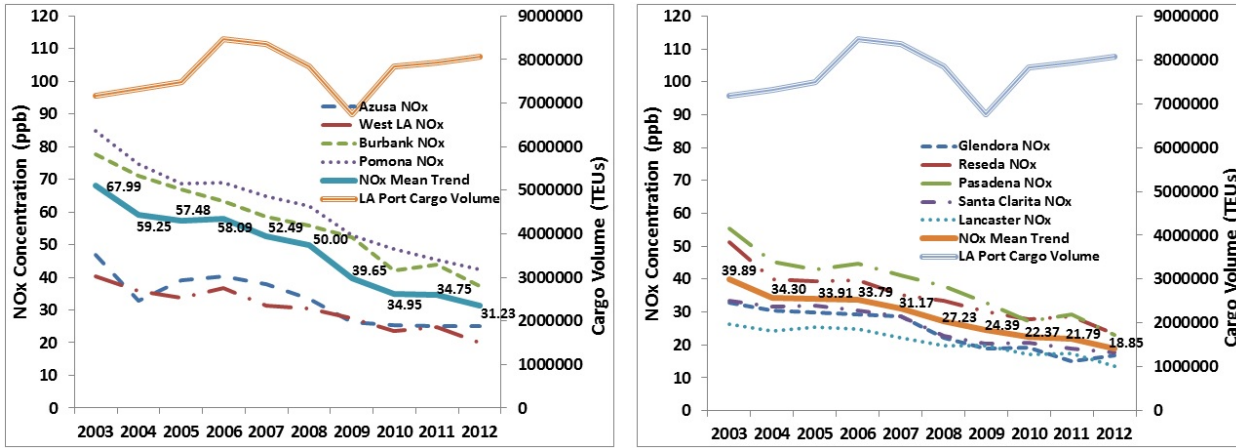

Figure A1-1. NO<sub>x</sub> in GMC (left) vs. CTRL (right) from SCAQMD monitoring and port cargo volumes.

Similarly, NO<sub>2</sub> mean concentrations in GMCs steadily decreased from 30.60 ppb in 2003 to 18.72 ppb in 2012, a reduction factor of 1.6 (Figure A1-2). Mean NO<sub>2</sub> concentrations in CTRLs decreased from 23.78 ppb in 2003 to 13.23 ppb in 2012, a reduction factor of 1.8. Again, the shape of the Los Angeles Port cargo volume and NO<sub>2</sub> mean concentration trend lines are not similar, suggesting that decreases in NO<sub>2</sub> concentration are not mainly related to changes in port cargo volume. The air pollution reduction factors for NO<sub>2</sub> and NO<sub>x</sub> ranged from 1.6 to 2.1, further indicating that it is feasible to identify possible improvements in health outcomes from the pre- to the post-policy intervention periods across domains.

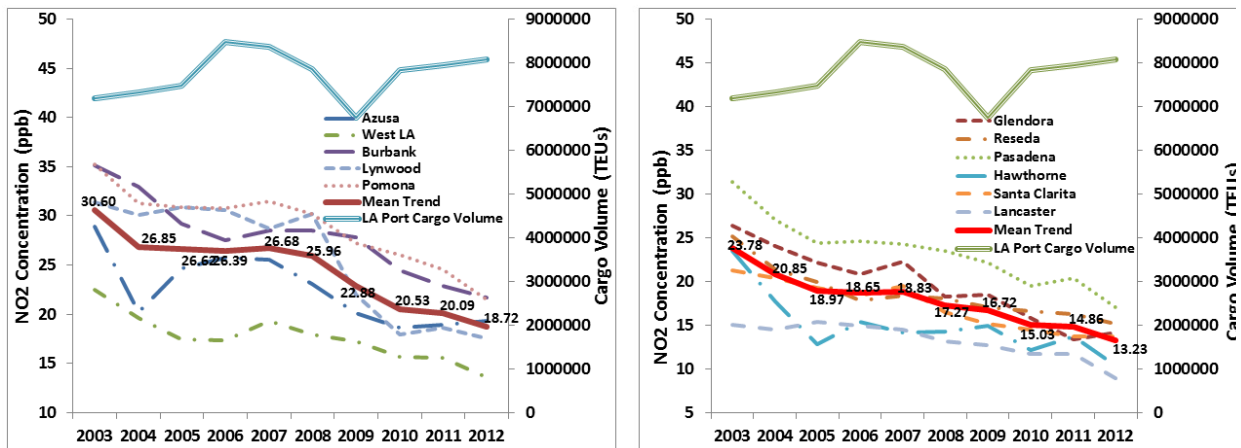

Figure A1-2. NO<sub>2</sub> in GMC (left) vs. CTRL (right) from SCAQMD monitoring and port cargo volumes.

### Fixed Site Ogawa Saturation Monitoring Results

To address the issue of lack in the granularity of monitoring data across space and time needed to characterize the consequences of goods movement regulations from government monitoring network, we deployed our own Ogawa monitors. During Year 1 of the project (fall 2012 to spring 2013), we successfully designed and deployed two new rounds of NO<sub>x</sub> sampling in Los Angeles and Alameda

counties. For the first round of deployment in Los Angeles, Ogawa samplers were deployed at 72 sites (92 monitors) in the fall of 2012 and collected from 70 sites (90 samplers, with two samplers lost due to vandalism). Data were available from 25, 21, and 24 sites in GMC, NGMC, and CTRL areas, respectively. Of note, all Ogawa samplers co-located with government sites had effective measurements. For our second round of deployment in Los Angeles County in spring 2013, Ogawa samplers were deployed and collected at 72 sites with a total of 92 monitors. The number of sites with effective data collection was 26, 22, and 24, for GMC, NGMC, and CTRL areas, respectively, with all government co-located sites having effective measurements.

In the San Francisco Bay Area (mainly in Alameda County), we successfully deployed 60 monitors at 49 sites and retrieved all deployed monitors in fall 2012 and spring 2013, during the same periods when Ogawa monitors were deployed and collected in Los Angeles. The number of sites with effective data collection was 19, 16, and 14, for GMC, NGMC, and CTRL areas, respectively. All Ogawa monitors co-located with government sites had effective measurements.

All sites were selected from those already used for Ogawa monitoring during the pre-policy period, specifically from 198 sites in Los Angeles monitored in fall 2006 and spring 2007 and 51 sites in the San Francisco Bay (one in Contra Costa County and the others in Alameda County) in fall 2004 and spring 2005.

### Pollution Reductions Based on Ogawa Measurements

Figure A1-3 displays boxplots of the measured NO<sub>2</sub>, NO, and NO<sub>x</sub> concentrations for the pre-policy (left-side of a panel) and post-policy (right-side of a panel) periods for Los Angeles (first three panels) and Alameda (the fourth panel) sites, summarized by domain. In Los Angeles, the median NO<sub>2</sub>

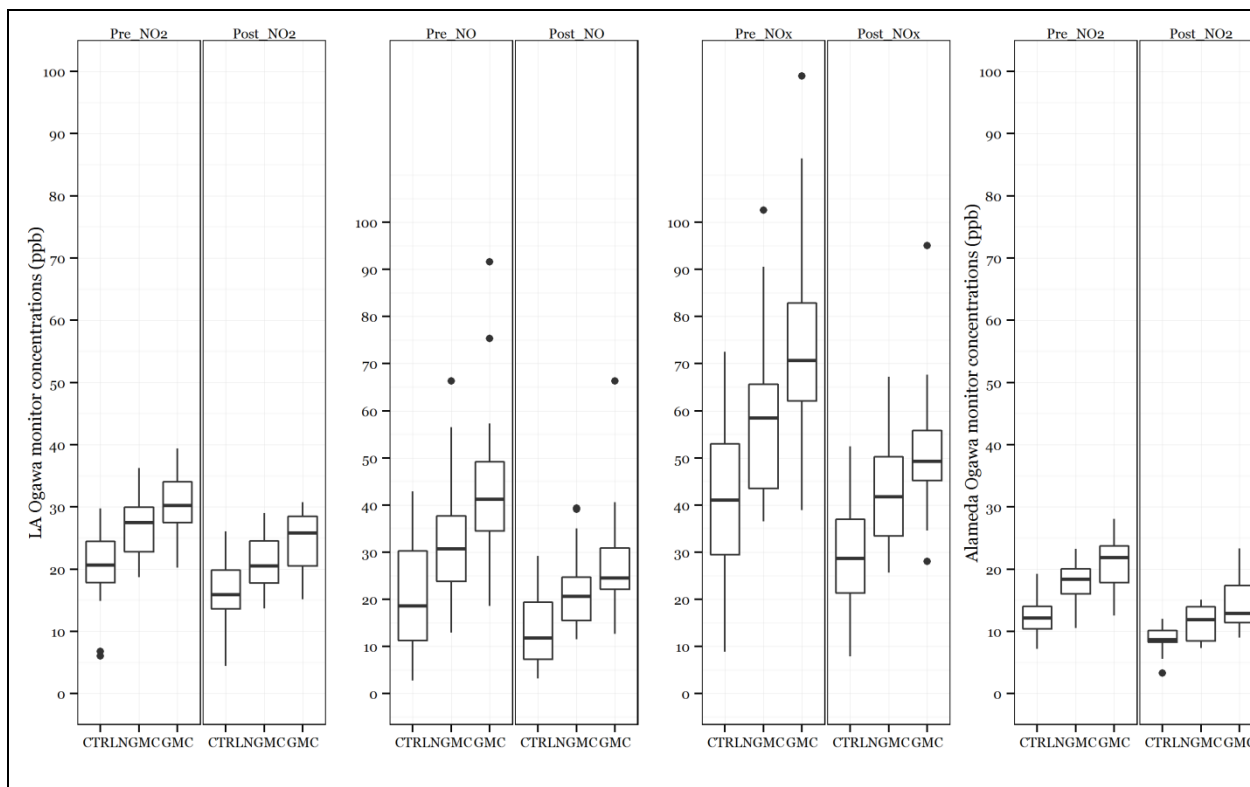

Figure A1-3. Boxplots of the measured NO<sub>2</sub>, NO, and NO<sub>x</sub> concentrations for the pre-policy (left-side of a panel) and post-policy (right-side of a panel) periods for Los Angeles (first three panels) and Alameda (the fourth panel), summarized by location category. (Data plots for NO and NO<sub>x</sub> reprinted with permission from Su et al 2016. Copyright 2016 American Chemical Society.)

concentrations decreased (in ppb), from 30.24 to 25.79, from 27.47 to 20.49, and from 20.67 to 15.92 in GMC, NGMC, and CTRL areas, respectively. For the near-source pollutant NO, reductions (in ppb) were 16.63, 10.09, and 6.80 in GMC, NGMC, and CTRL areas, respectively. For NO<sub>x</sub>, the respective reductions (in ppb) in GMC, NGMC, and CTRL areas were 21.41, 16.67, and 12.37. The range of reduction factors for NO was 1.5-1.7, with GMCs having the greatest reduction factor. For NO<sub>x</sub> and NO<sub>2</sub>, the reduction factors were 1.40-1.43 and 1.2-1.3, respectively. Please note, Ogawa measurements in Los Angeles for the pre-policy period were conducted in fall 2006 and spring 2007, late in the pre-policy period. We expect if measurements had been taken earlier in the pre-policy period, starting from 2003, we would have captured greater reduction factors for NO<sub>2</sub> and NO<sub>x</sub> than the factor of 1.5 recommended by van Erp and Cohen (2009) (please see the air pollution trend analyses above using government continuous monitoring data). This is clearly the case for Alameda. In Alameda, the pre-policy Ogawa measures for NO<sub>2</sub> were taken in the fall of 2004 and spring of 2005. The post-policy Ogawa measures were taken in the fall of 2012 and spring of 2013. The median concentrations of NO<sub>2</sub> were reduced (in ppb), from 21.86 to 12.91, from 18.36 to 11.85, and from 12.11 to 8.64 in GMC, NGMC, and CTRL areas,

respectively. The corresponding reduction factors were 1.7, 1.6, and 1.4 in GMCs, NGMCs, and CTRLs. These findings further confirm that it is feasible to identify possible improvements in health.

### *Agreement of Ogawa Monitoring with Co-located Government Monitoring*

We colocated Ogawa monitors with government monitors for every two 2-week periods during which Ogawa saturation sampling was conducted and modeled relationships between types of monitoring (Figure A1-4). Co-located site data exist for Los Angeles and Alameda for 2004-2005 (Alameda), 2006-2007 (Los Angeles), and 2012-2013 (Alameda and Los Angeles). For NO<sub>2</sub>, 56 colocated samples were retrieved, and for NO<sub>x</sub>, 50 were retrieved (In Alameda, Ogawa was only used to measure NO<sub>2</sub> in the 2004-2005 pre-policy period). Figure 4 indicates that Ogawa-measured concentrations correlated well with government-measures ( $R^2 = 0.87$  for NO<sub>2</sub> and 0.90 for NO<sub>x</sub>), with NO<sub>2</sub> being slightly underestimated and NO<sub>x</sub> being slightly over-estimated.

### *Policy Effect on Reductions of Pollutant Concentrations Based on Modeling Ogawa Monitoring*

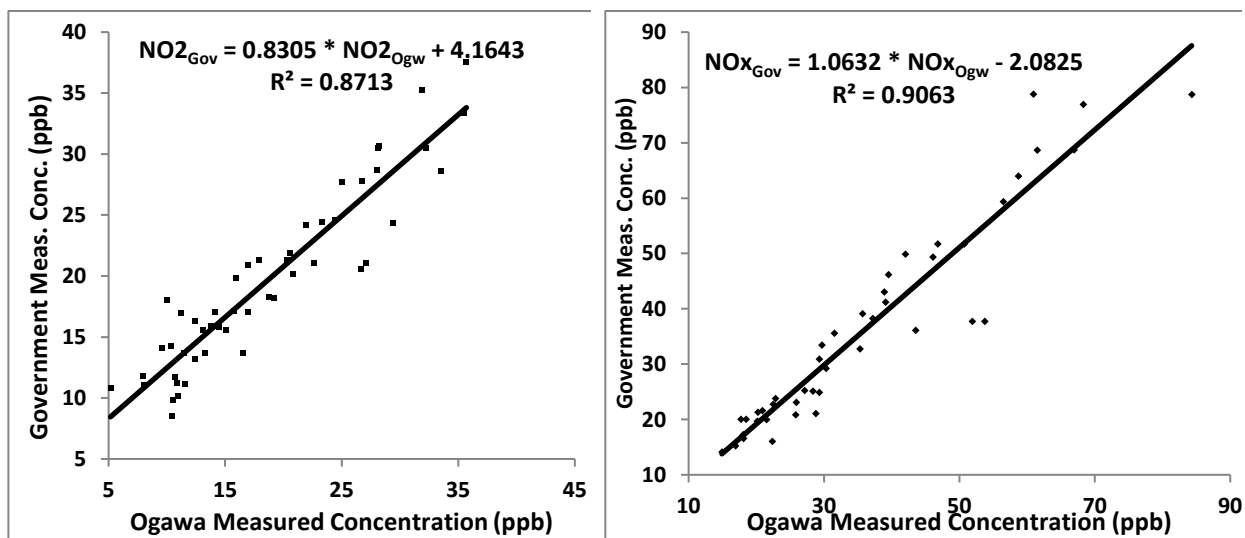

Figure A1-4. Agreement between the government monitoring and Ogawa monitoring at the co-located sites. (Reprinted with permission from Su et al 2016. Copyright 2016 American Chemical Society.)

### *Results*

Using linear mixed models, we analyzed the difference in concentrations measured by Ogawa monitors in pre- and post-policy periods and between GMCs versus NGMCs and CTRLs. To adjust for the effects of weather and economic recession on reductions of air pollutant concentrations, we acquired data that could confound regulatory policy effects, including meteorology (e.g., precipitation,

temperature, and wind speed), monthly and annual port cargo volumes from the major ports, annual average daily traffic (AADT) volumes for highways and major roadways, and AADT for truck-permitted highways and major roadways. The weighted cargo volume is calculated as follows:

$$g_{si} = \sum_{p=1}^2 g_{pi} / d_{ps} \quad (1)$$

$g_{si}$  is the weighted cargo volume for monitor  $s$  at time  $i$  ( $i = 2003-2012$ ).  $g_{pi}$  is the annual total cargo volume for port  $p$  ( $p=1$  for LA/LB and  $p=2$  for Oakland) at the time period  $i$ .  $d_{ps}$  is the distance between port  $p$  and monitor  $s$ .

Models were developed using the following two steps:

- 1) We estimated the independent effects of domain and policy period on pollutant concentrations while adjusting for possible confounding factors. We treated the site as a random effect. The model we employed is shown in Eq. 2:

$$y_{si} = \beta_0 + d_s + p_i + \beta_1 f_{si} + \gamma_s + \varepsilon_{si} \quad (2)$$

$y_{si}$  is the pollutant concentration at site  $s$  for policy period  $i$ .  $d_s$  is the domain/location category, i.e., GMC, NGMC, or CTRL, with CTRL being the reference.  $p_i$  indicates the policy period during pollutant sampling, with the pre-policy period being the reference.  $f_i$  represents confounding factors that might impact the relationship between measured concentrations and policy regulation, including traffic density, cargo volume, and meteorology.  $\beta_0$  is the model constant;  $\beta_1$  is a vector of coefficients for possible confounding factors.  $\gamma_s$  is the random effect at site  $s$  and  $\varepsilon_{si}$  is the error term of site  $s$  for policy period  $i$ . Because the domain of a site did not change between the two policy periods,  $d_{si}$  was simplified in the model to  $d_s$ . Similarly, since regulation policies were the same across all sites,  $p_{si}$  was simplified to  $p_i$ . Separate models as in Eq. 2 were used to model pollutant concentrations of NO<sub>2</sub> and NO<sub>x</sub>.

- 2) We created an interaction term between domain and policy period to assess whether reductions in pollutant concentrations in GMCs from pre- to post-policy periods were greater than corresponding reductions in CTRLs. The modeling technique is described below in Eq. 3:

$$y_{si} = \beta_0 + d_s + p_i + d_s p_i + \beta_1 f_{si} + \gamma_s + \varepsilon_{si} \quad (3)$$

where  $d_s p_i$  is the interaction between the domain of site  $s$  and policy period  $i$ . Other variables have the same definition as in Eq 2. In the regression equations, the categorical covariates will be modeled in the usual manner as a series of dummy variables.

The linear mixed-effects modeling results with the interaction terms (based on Eq. 3) for NO<sub>2</sub> and NO<sub>x</sub> are shown in Table A1-1. For NO<sub>2</sub>, we found that being in a GMC was associated with significantly higher concentrations (than being in a CTRL area), followed by being in an NGMC. Greater precipitation and higher wind speed were found to be associated with lower NO<sub>2</sub> concentrations due to dispersion and sinking effects. Total vehicle miles traveled on highways and connecting roadways were positively associated with NO<sub>2</sub> concentrations; however, cargo volume and truck vehicle miles traveled did not significantly impact NO<sub>2</sub> concentrations. The spring season (rainy season) generally had lower NO<sub>2</sub> concentrations than the fall season, and Los Angeles sites had higher NO<sub>2</sub> concentrations than Alameda sites. For the interaction term, we found that reductions in NO<sub>2</sub> from the pre-policy to the post-policy period were significantly greater in GMCs compared to the reductions in CTRL areas after controlling for traffic, cargo volume, and meteorology. Reductions of NO<sub>2</sub> were also significant in NGMCs, compared to those in CTRLs.

For NO<sub>x</sub>, we found that being in a GMC area had the greatest impact on pollutant concentrations, followed by being in an NGMC. These differences were greater than they were for NO<sub>2</sub>. Similar to NO<sub>2</sub>, greater precipitation and higher wind speed were associated with lower NO<sub>x</sub> concentrations. Total vehicle miles traveled on highways and connecting roadways were positively associated with NO<sub>x</sub> concentrations; however, cargo volume and truck vehicle miles traveled did not significantly predict NO<sub>x</sub> concentrations. Compared to the pre-policy period NO<sub>x</sub>, post-policy period NO<sub>x</sub> concentrations were still statistically significantly lower. Based on the interaction term, we found that the reductions of NO<sub>x</sub> from the pre-policy to the post-policy period were significantly greater in GMCs than corresponding reductions in CTRLs when controlling for the same factors that predict the exposures. The non-significant interaction term for NGMC and policy period, however, indicates that policy regulations did not reduce NO<sub>x</sub> in NGMCs vs. CTRLs.



Table A1-1. Modeling the effect of policy regulations on reductions of pollutant concentrations for NO<sub>2</sub> and NO<sub>x</sub> while controlling for traffic, cargo volume, meteorological conditions, season and region.<sup>§</sup>

|                 |                                               | Coeff      | S.E.      | t-Val   | p-Val |
|-----------------|-----------------------------------------------|------------|-----------|---------|-------|
| NO <sub>2</sub> | (Intercept)                                   | 33.059945  | 2.445339  | 13.5196 | 0.000 |
|                 | Condition – GMC                               | 7.570715   | 1.388160  | 5.4538  | 0.000 |
|                 | Condition – NGMC                              | 3.422824   | 1.097543  | 3.1186  | 0.002 |
|                 | Policy Period – Post                          | -4.161154  | 0.452964  | -9.1865 | 0.000 |
|                 | Precipitation (In)                            | -2.085161  | 0.284733  | -7.3232 | 0.000 |
|                 | Temperature (°F)                              | -0.067602  | 0.035417  | -1.9088 | 0.056 |
|                 | Wind Speed (mph)                              | -2.196679  | 0.286575  | -7.6653 | 0.000 |
|                 | Distance weighted Cargo (TEU/KM) <sup>†</sup> | 0.000004   | 0.000004  | 0.9996  | 0.318 |
|                 | Vehicle Kilometers Traveled                   | 0.000003   | 0.000001  | 2.2858  | 0.022 |
|                 | Truck Kilometers Traveled                     | -0.000038  | 0.000038  | -0.9981 | 0.318 |
|                 | Season – Spring                               | -1.394105  | 0.396553  | -3.5156 | 0.000 |
|                 | County - Los Angeles                          | 9.259356   | 0.711465  | 13.0145 | 0.000 |
|                 | Condition - GMC * Policy Period - Post        | -2.706126  | 0.613683  | -4.4096 | 0.000 |
|                 | Condition - NGMC * Policy Period - Post       | -1.566309  | 0.628940  | -2.4904 | 0.013 |
| NO <sub>x</sub> | (Intercept)                                   | 122.326467 | 15.660905 | 7.8109  | 0.000 |
|                 | Condition – GMC                               | 18.104974  | 5.359311  | 3.3782  | 0.001 |
|                 | Condition – NGMC                              | 5.602362   | 4.236699  | 1.3223  | 0.186 |
|                 | Policy Period – Post                          | -15.318597 | 1.655638  | -9.2524 | 0.000 |
|                 | Precipitation (In)                            | -2.816964  | 1.047529  | -2.6892 | 0.007 |
|                 | Temperature (°F)                              | -0.801557  | 0.234634  | -3.4162 | 0.001 |
|                 | Wind Speed (mph)                              | -7.848811  | 0.970618  | -8.0864 | 0.000 |
|                 | Distance weighted Cargo (TEU/KM) <sup>†</sup> | 0.000015   | 0.000012  | 1.2204  | 0.222 |
|                 | Vehicle Kilometers Traveled                   | 0.000012   | 0.000005  | 2.6609  | 0.008 |
|                 | Truck Kilometers Traveled                     | -0.000004  | 0.000141  | -0.0281 | 0.978 |
|                 | Season – Spring                               | 0.939653   | 2.570465  | 0.3656  | 0.715 |
|                 | County - Los Angeles                          | 24.389814  | 2.907940  | 8.3873  | 0.000 |
|                 | Condition - GMC * Policy Period - Post        | -7.816863  | 2.360474  | -3.3116 | 0.001 |
|                 | Condition - NGMC * Policy Period - Post       | -2.238253  | 2.417354  | -0.9259 | 0.354 |

<sup>§</sup> The reference group for GMC and NGMC is CTRL; the reference group for post-policy regulation period is pre-policy regulation period. Alameda is the reference group for variable County. Fall is the reference group for variable Season.

<sup>†</sup> TEUs were first adjusted by respective distances to the Oakland port, LA-LB ports, and Stockton port through TEUs/Km and then added up to create a single distance weighted cargo volume for each location of interest.

We also specifically investigated the policies implemented by CARB during the last ten years and found that the *2006 Emission Reduction Plan for Ports and Goods Movement* was the primary policy to target big polluters. In our findings, reductions of traffic-related air pollutants in GMCs were significantly greater than in other areas for the post-policy period, after controlling for traffic, cargo volume, and meteorology; thus, it is logical to conclude that these regulatory policies had a significant impact in reducing traffic-related air pollution specific to goods movement.

### Policy Effect on Reductions of Pollutant Concentrations for PM<sub>2.5</sub>, PM<sub>10</sub>, and CO

As when modeling the policy effect on reductions of NO<sub>x</sub>, we analyzed the difference in concentrations for PM<sub>2.5</sub>, PM<sub>10</sub>, and CO measured by government monitors in the pre- and post-policy time periods and between GMCs/NGMCs and CTRLs. To adjust for the effects of economic recession on reductions of air pollutant concentrations, we controlled for confounding using annual port cargo volumes from the Los Angeles/Long Beach and Oakland ports. To model the effect of policy intervention, we created an interaction between domain and policy period to assess whether reductions in pollutant concentrations in GMCs/NGMCs from the pre- to the post-policy periods were greater than corresponding reductions in CTRLs. The modeling technique is described below in Eq. 4:

$$y_{si} = \beta_0 + d_s + p_i + d_s p_i + \beta_1 g_{si} + \gamma_s + \varepsilon_{si} \quad (4)$$

$y_{si}$  is the pollutant concentration of PM<sub>2.5</sub>, PM<sub>10</sub>, or CO at site  $s$  for time period  $i$  ( $i=2003-2012$ ).  $d_s p_i$  is the interaction between the domain of site  $s$  and policy period for time period  $i$ .  $g_{si}$  represents confounding from cargo and other factors. Other variables have the same definitions as those in Eqs. 2 and 3. Separate models, as in Eq. 4, were used to model reductions of pollutant concentrations for PM<sub>2.5</sub>, PM<sub>10</sub>, and CO, and the modeling results are presented in Table A1-2. We found that for PM<sub>10</sub> and CO, the reductions in concentrations for GMCs are statistically significant compared to CTRLs. The reductions in pollutant concentrations for PM<sub>2.5</sub> in GMCs are not statistically significant compared to CTRLs; however, the reductions in NGMCs for PM<sub>2.5</sub> are statistically significant compared to CTRLs.

Table A1-2. Modeling the effect of policy regulations on reductions of pollutant concentrations for PM<sub>2.5</sub>, PM<sub>10</sub>, and CO while controlling for cargo volume using state-wide monitoring data.

| <b>PM<sub>2.5</sub> Model</b>           |            |           |        |       |
|-----------------------------------------|------------|-----------|--------|-------|
|                                         | Coeff      | S.E.      | t-Val  | p-Val |
| (Intercept)                             | 11.1652655 | 1.1695381 | 9.547  | 0.000 |
| Condition – GMC                         | 0.1278357  | 1.4012394 | 0.091  | 0.927 |
| Condition – NGMC                        | 1.6949859  | 1.3315093 | 1.273  | 0.203 |
| Policy Period – Post                    | -1.1497838 | 0.3737591 | -3.076 | 0.002 |
| Distance weighted Cargo (TEU/KM) ‡      | -0.0110555 | 0.2765683 | -0.040 | 0.968 |
| Condition - GMC * Policy Period - Post  | -0.4773312 | 0.4488116 | -1.064 | 0.288 |
| Condition - NGMC * Policy Period - Post | -1.2284427 | 0.4277888 | -2.872 | 0.004 |
| <b>PM<sub>10</sub> Model</b>            |            |           |        |       |
| (Intercept)                             | 27.9029388 | 1.9123472 | 14.591 | 0.000 |
| Condition – GMC                         | -3.5298648 | 2.5918667 | -1.362 | 0.173 |
| Condition – NGMC                        | -0.3765577 | 2.4035161 | -0.157 | 0.875 |
| Policy Period – Post                    | -5.8445447 | 0.7162890 | -8.160 | 0.000 |
| Distance weighted Cargo (TEU/KM) ‡      | 1.2072906  | 0.7808675 | 1.546  | 0.122 |
| Condition - GMC * Policy Period - Post  | 2.5816391  | 0.9705736 | 2.660  | 0.008 |
| Condition - NGMC * Policy Period - Post | 1.7040607  | 0.9098229 | 1.873  | 0.061 |
| <b>CO Model</b>                         |            |           |        |       |
| (Intercept)                             | 4.4996247  | 0.5069178 | 8.876  | 0.000 |
| Condition – GMC                         | 1.4327507  | 0.6515652 | 2.199  | 0.028 |
| Condition – NGMC                        | 0.0956803  | 0.5798105 | 0.165  | 0.869 |
| Policy Period – Post                    | -0.7811563 | 0.1889287 | -4.135 | 0.000 |
| Distance weighted Cargo (TEU/KM) ‡      | -0.0990623 | 0.1778022 | -0.557 | 0.577 |
| Condition - GMC * Policy Period - Post  | -0.7875811 | 0.2441875 | -3.225 | 0.001 |
| Condition - NGMC * Policy Period - Post | -0.1127484 | 0.2168386 | -0.520 | 0.603 |

‡ TEUs were first adjusted by respective distances to the Oakland port, LA-LB ports, and Stockton port through TE cargo volume for each location of interest.

For all the three models (PM<sub>2.5</sub>, PM<sub>10</sub>, and CO), we found that the pollutant concentrations in the post-policy period are lower than corresponding concentrations in the pre-policy period. However, compared to CTRLs, concentrations in GMCs for PM<sub>10</sub> were found to have relatively lower concentrations when the statewide data were used. This is because the levels of pollutant concentrations for the three location categories could be well mixed up when statewide data are used, with some locations in GMCs having lower concentrations than other locations in CTRLs. In addition, pollutant concentrations are not measured in all years from 2003-2012. When there are more measurements in GMCs in locations with relatively low concentrations, the mean concentrations in GMCs could be smaller than the corresponding mean in CTRL. We thus modeled their concentrations separately using the four California climate regions: the coast, the mountains, the Central Valley, and the desert. For the coastal areas, we modeled their concentrations by combining data from Los Angeles and Alameda (Table A1-3), as we did for the models on NO<sub>2</sub> and NO<sub>x</sub>. Table 6 shows the reductions in concentrations of NO<sub>2</sub> for GMCs are statistically significant compared to CTRLs. The reductions in PM<sub>2.5</sub> for GMCs are marginally significant compared to the reductions in CTRLs (p = 0.10).

Table A1-3. Modeling the effect of policy regulations on reductions of pollutant concentrations for PM<sub>2.5</sub>, PM<sub>10</sub>, and CO while controlling for cargo volume using government monitoring data for Los Angeles and Alameda counties.

| <b>PM<sub>2.5</sub> Model</b>           |            |           |        |       |
|-----------------------------------------|------------|-----------|--------|-------|
|                                         | Coeff      | S.E.      | t-Val  | p-Val |
| (Intercept)                             | 11.1784166 | 2.4049881 | 4.648  | 0.000 |
| Condition – GMC                         | 6.1504905  | 2.9368492 | 2.094  | 0.036 |
| Condition – NGMC                        | -1.0329615 | 2.2923530 | -0.451 | 0.652 |
| Policy Period – Post                    | -3.2940452 | 0.5949208 | -5.537 | 0.000 |
| Distance weighted Cargo (TEU/KM) ‡      | -1.0178663 | 0.3005073 | -3.387 | 0.001 |
| County - Los Angeles                    | 5.1158031  | 2.2731253 | 2.251  | 0.024 |
| Condition - GMC * Policy Period – Post  | -1.3350879 | 0.8134997 | -1.641 | 0.101 |
| Condition - NGMC * Policy Period - Post | 0.4576244  | 0.7388198 | 0.619  | 0.536 |
| <b>PM<sub>10</sub> Model</b>            |            |           |        |       |
| (Intercept)                             | 21.4241582 | 2.1557230 | 9.938  | 0.000 |
| Condition – GMC                         | 3.9171608  | 4.0295330 | 0.972  | 0.331 |
| Condition – NGMC                        | -3.1684557 | 2.4179380 | -1.310 | 0.190 |
| Policy Period – Post                    | -1.7814477 | 1.3270550 | -1.342 | 0.179 |
| Distance weighted Cargo (TEU/KM) ‡      | 0.0910951  | 0.4306860 | 0.212  | 0.832 |

|                                         |            |           |        |       |
|-----------------------------------------|------------|-----------|--------|-------|
| County - Los Angeles                    | 10.5608631 | 2.1010060 | 5.027  | 0.000 |
| Condition - GMC * Policy Period – Post  | -5.3913847 | 1.7756410 | -3.036 | 0.002 |
| Condition - NGMC * Policy Period - Post | -1.3888416 | 1.5450940 | -0.899 | 0.369 |

---

**CO Model**

|                                         |            |           |        |       |
|-----------------------------------------|------------|-----------|--------|-------|
| (Intercept)                             | 4.8705279  | 0.9693180 | 5.025  | 0.000 |
| Condition – GMC                         | 2.4819446  | 1.2957760 | 1.915  | 0.055 |
| Condition – NGMC                        | -0.8732379 | 1.0223238 | -0.854 | 0.393 |
| Policy Period – Post                    | -1.4389203 | 0.3393024 | -4.241 | 0.000 |
| Distance weighted Cargo (TEU/KM) ‡      | -0.2786949 | 0.2076159 | -1.342 | 0.179 |
| County - Los Angeles                    | 0.9228763  | 0.9377739 | 0.984  | 0.325 |
| Condition - GMC * Policy Period – Post  | -0.9218610 | 0.4582721 | -2.012 | 0.044 |
| Condition - NGMC * Policy Period - Post | 0.4919791  | 0.4082064 | 1.205  | 0.228 |

‡ TEUs were first adjusted by respective distances to the Oakland port, LA-LB ports, and Stockton port through TEUs/Km and then added up to create a single distance weighted cargo volume for each location of interest.

Note: On some statewide models, the coefficient Condition – GMC is negative. However, it is consistent that the mean pollutant concentrations are always lower in the post-policy period (negative sign in coefficients). When we limited our study regions to Los Angeles and Alameda, we found that the coefficient Condition – GMC is positive, indicating concentrations in GMCs are higher than in CTRLs. Separate pollutant surfaces will be created using separate modeling results for each of the four climate regions.

## Appendix 2: LUR Modeling and Concentration Assessment

The location categories including GMC, NGMC, and CTRL across California are displayed in Figure A2-1.

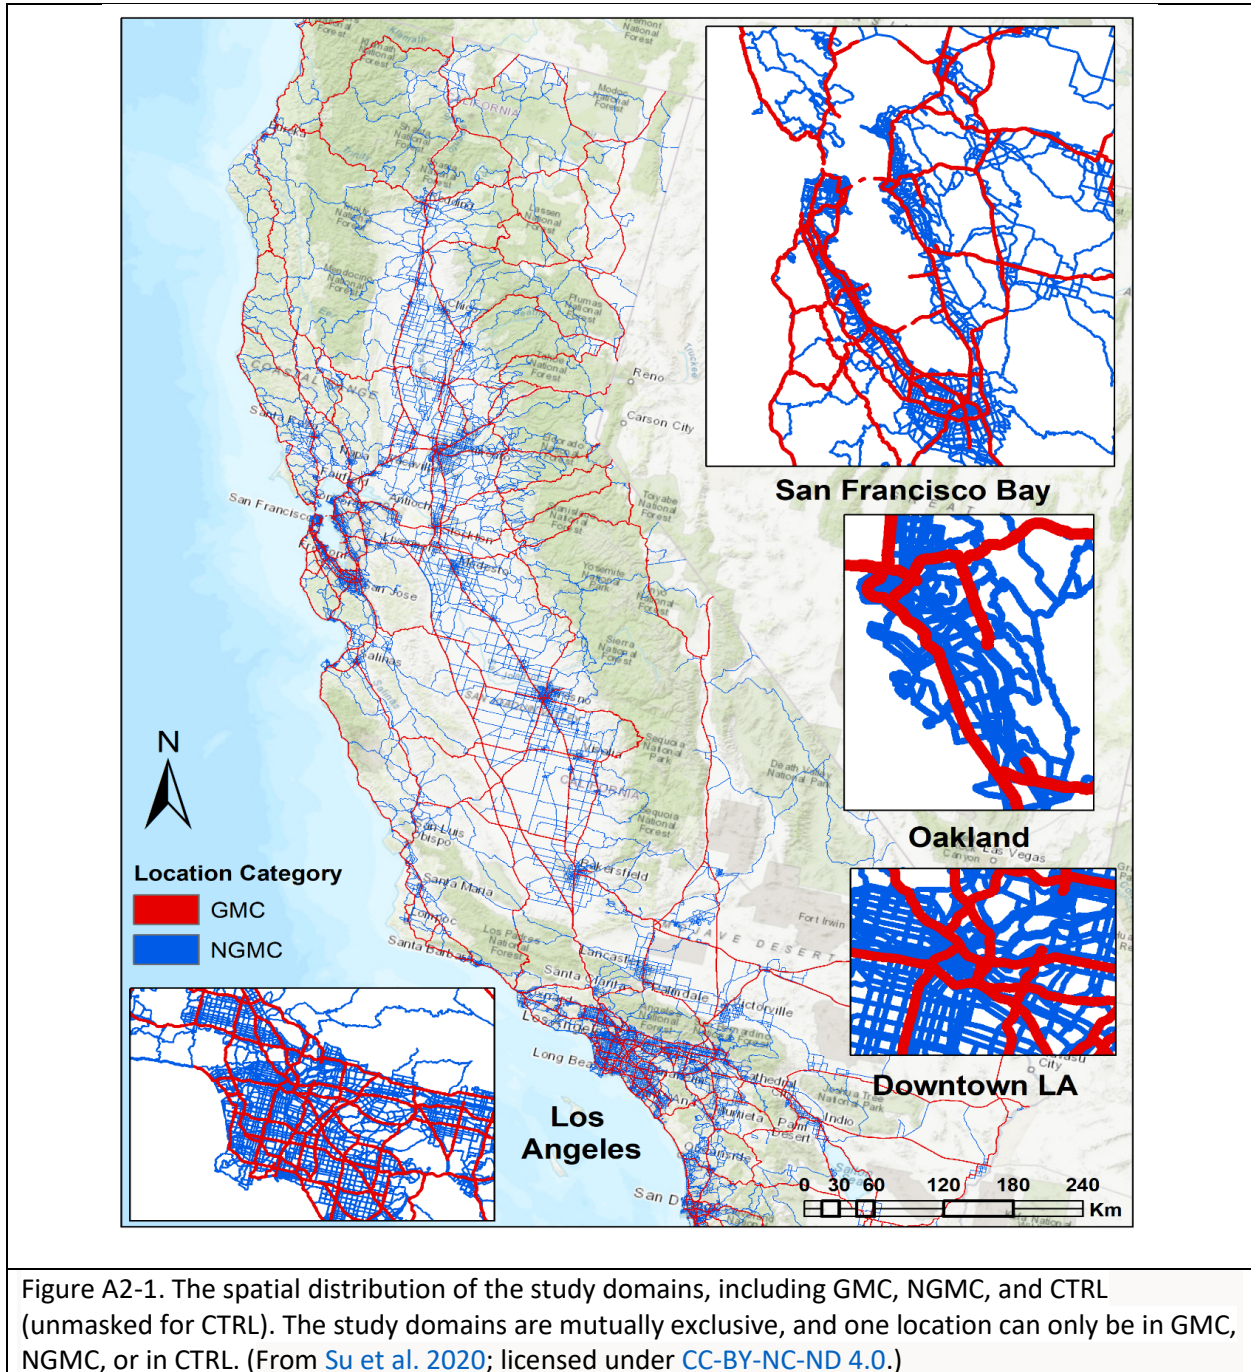

## Acquisition and processing of LUR predictors

We acquired and processed related data for the development of LUR models across California and they included both buffered and non-buffered data sources. The non-buffered data sources included:

**Digital elevation model (DEM) – in meters:** We acquired the national elevation dataset for California from the U.S. Geological Survey (USGS) (<http://nationalmap.gov> and <http://seamless.usgs.gov>) for 2011. The data included 45 1/3 arc-second (approx. 10 meters) raster DEM and were mosaicked into a single DEM raster for the entire state.

**Distance to coast – in meters:** The California shoreline was derived from The National Assessment of Shoreline Change: A GIS Compilation of Vector Cliff Edges and Associated Cliff Erosion Data for the California Coast (<http://pubs.usgs.gov/of/2007/1112>). These data are integrated into the Geographic Information System (GIS) mapping tool to produce a geographic view of topographical changes in California's coastline over time. The most recent view was created using data collected between 1998-2002.

**Distance to roadways – in meters:** We used Business Analysts 2010 Street Carto map layer provided by the Environmental Systems Research Institute (ESRI in Redlands, CA) to derive the distance to the nearest highway (defined as feature class classification or FCC A1 and A2), to the nearest major roadway (FCC A3) and to the nearest local roadway (FCC A4).

**Distance weighted cargo volume – TEU/Km:** We acquired monthly and annual cargos for the Oakland, Los Angeles (LA), and Long Beach (LB) ports from corresponding port authorities for 2003–2012 periods. The boundary layer of the three ports was acquired from Caltrans (California Department of Transportation) for 2011. We used TEU statistics for the cargo volumes in the three ports. TEUs are twenty-foot equivalent units, a standardized maritime industry measurement used when counting cargo containers of varying lengths. Because of the adjacency of LA and LB ports, we merged monthly and annual cargos and corresponding spatial boundaries and treated them as a single LA-LB port complex. TEUs were first adjusted by corresponding distances to the Oakland and LA-LB ports through TEUs/Km and then added up to create a single distance weighted cargo volume for each location of interest for each year from 2004 to 2010.

**Location category – unitless:** By using Business Analysts 2010 and the port boundary layer, we first separated the entire California roadway system into three parts: the first part includes locations within 500 m of FCC A1 or A2, or within 500 m of any of the three ports (i.e., goods movement corridors); the second part includes locations not encompassed in the first part and is within 300 m of FCC A3 (i.e., non-goods movement corridors); the third part includes locations not encompassed in the first and second parts (i.e., control areas). We then first enhanced the above location categories by reclassifying the first part with truck usage restrictions (see <http://www.dot.ca.gov/hq/traffops/engineering/trucks/routes/restrict-list.htm>) to non-goods movement corridors.

**Locational data – in meters (Alberts projection):** Because we suspected there might be a spatial trend in levels of pollutant concentrations, we used latitude and longitude information as potential covariates for prediction.

**Meteorological data:** We acquired daily meteorological data from the California Irrigation Management Information System (CIMIS) for the 2003-2012 periods for the entire State. CIMIS includes 167 active weather stations across the state from 2003-2012. The daily temperature and wind speed data were aggregated to monthly and annual means. Spatial interpolation algorithm inverse distance weighting was used to create statewide monthly and annual surfaces in temperature and wind speed. The monthly and annual temperatures and wind speeds for each government and Ogawa monitor were then estimated for use as covariates for LUR modeling.

For the buffered data, buffer distances of 50 m to 2000 m, with an incremental unit of 50 m, were created and the statistics within a specified buffer distance were calculated separately for each location of interest. They included:

**Land use data – in hectares (ha):** We acquired land cover data for the entire state of California from the U.S. Geological Survey (USGS) for 2006 and 2011. The National Land Cover Database (NLCD) is a 16-class land cover classification scheme that has been applied consistently across the conterminous United States at a spatial resolution of 30 meters. We were interested in the combined classes that either act as a sink (reduces levels of pollution), a source (contributes to air pollution) or a non-source (lack of emission and reduction), including (1) Veg1: natural vegetation including forest (41, 42 and 43, see coding in Appendix 1), shrubland (51 and 52) and herbaceous (71, 72, 73 and 74); (2) Veg2: all vegetation including Veg1 plus developed open space (21); (3) NE1: natural environments including all the land cover types other than developed low intensity (22), medium intensity (23), high intensity (24) and water (11 open water and 12 perennial ice/snow); (4) NE2: natural environments including all the land cover types other than developed low intensity (22), medium intensity (23), and high intensity (24); (5) DHi: developed high intensity (24) land cover.

For the pre-policy period (2004-2007) we used NLCD2006 data for land cover information and for the post-policy period (2008-2010) we used NLCD2011 data for land cover classification. We assume relative stability of land cover types, respectively, for the pre- and post-policy intervention periods. Buffer distances of 50 m to 2000 m, with an incremental unit of 50 m, were created and the total acreage (in ha) of each land cover type within a specified buffer distance was calculated separately for each location of interest.

**Traffic data – in Vehicle Kilometers Traveled (VKT):** In assigning measured postmile traffic data (AADT) in a year to the highway roadways in California, we used the 2016 highway network provided by Caltrans as a reference road network. We assumed that the highway road network remained largely unchanged throughout the study period. The following procedures were used to assign AADT data to the California highway network.

Step 1: The postmile traffic data provided by Caltrans include route, county, district, and postmile data, in addition to the measured traffic data. The reference highway network data include route, county, district, and beginning and ending postmiles for each roadway segment. A postmile traffic data



was assigned to a reference roadway segment if (1) the two are in the same route, county and district, and (2) the postmile of the measured traffic data is between the roadway segment's beginning and ending postmiles. A roadway segment could include multiple postmile traffic data records for a single year.

Step 2: For years 2010-2015, Caltrans also includes spatial point data (in ArcGIS shapefile) for postmile traffic data. We did not use the spatial information from the postmile traffic to assign traffic counts to the reference road network spatially because the Caltrans road network was found in some cases to not be accurate (sometimes several hundred meters deviation from real roadways). The geolocation information of the postmile traffic data, however, was found to be accurate (on the accurate road network provided by the ESRI Business Analysts for 2012). After postmile traffic data assignment in Step 1, we used the spatial information to assign remaining postmile traffic data that were not successfully applied in Step 1 to the reference roadway segments. Specifically, we buffered all the road network segments by 50 m, and a postmile traffic data point (from the remaining ones) within a 50 m buffered road network segment was assigned to that road network segment.

All the highway roadway segments that were assigned postmile traffic data from Step 1 and 2 were merged into a single dataset and the mean traffic volume for each roadway segment was calculated.

Step 3: All the roadway segments without postmile traffic data being assigned were further assigned based on corresponding closest roadway segments (based on the distance between roadway segment middle points) that were assigned traffic from Step 1 and 2 using the following criteria: both roadway segments belong to the same route, county, and district.

Step 4: All the remaining roadway segments without postmile traffic being assigned were further assigned based on corresponding closest roadway segment (based on the distance between roadway segment middle points) that were assigned traffic from Step 1, 2 and 3 using the following criterion: both roadway segments belong to the same route.

Similar procedures were used to assign annual postmile truck traffic data to the California highway segments using the postmile truck traffic data and the California highway truck road network data. We used the California highway truck road network for 2015 as a reference highway truck road network for data assignments. Through these steps, all the Caltrans highway road networks are assigned annual traffic counts for years 2004-2010.

The Caltrans highway network vehicle (AADT) and truck traffic data (AADTT) were then used to calculate vehicle (VKT) and truck kilometers traveled (TKT) at buffer distances from 50 m to 2000 m, with an incremental unit of 50 m separately for total vehicle and truck traffic for each location of interest. The VKT and TKT were estimated for individual years 2004-2010.

#### Acquisition and processing of air pollution data

We acquired air pollution data from both the government's continuous air quality monitoring and our saturation monitoring. They included:

**Criteria pollutant NO<sub>2</sub>, PM<sub>2.5</sub>, and Ozone data:** Criteria pollutants included those collected by U.S. EPA. They included annual summary data for the state of California for years 2004-2012 ([https://aqhdr1.epa.gov/aqswweb/aqstmp/airdata/download\\_files.html#Annual](https://aqhdr1.epa.gov/aqswweb/aqstmp/airdata/download_files.html#Annual)) and our focus was on NO<sub>2</sub>, PM<sub>2.5</sub>, and ozone.

**Ogawa saturation monitoring data:** We have collected Ogawa data for both pre- and post-policy intervention periods for the San Francisco Bay and the LA regions. Table A1-1 displays the date of data collection, pollutants measured, and effective sample sizes. To enable us to merge the Ogawa data with the government monitoring data, all the Ogawa data were corrected based on the government monitoring data through collocated sites. Because of differences in vehicle emissions and urban structures, especially for highway roadways, the NO<sub>2</sub> and NO<sub>x</sub> data collected through Ogawa were corrected separately for policy periods and regions. We found the agreement (correlation coefficient) for measured pollutant concentrations at the same 14-day period between the collocated government and Ogawa monitors ranged from 0.69 to 0.98 (Table A2-1), indicating the overall representativeness of using Ogawa monitors for NO<sub>2</sub> and NO<sub>x</sub> monitoring. After consulting with the experts in the Research Triangle Park (North Carolina, USA), the company responsible for providing us the Ogawa samplers and the analysis of the sampled data, we concluded that the reasons for some discrepancy between government monitoring and our Ogawa monitoring were partly because the Ogawa data were calibrated based on the latest lab results, but the government data were rarely calibrated. We also investigated the number of effective hours of data collection for every government site during the same period when an Ogawa monitor was collocated. We found the number of hours for government monitors ranged from 34 hours to the full range of 14 days. Even though we removed those government monitoring stations with the number of effective hours of measurement being less than 200 in our effort to calibrate the measured Ogawa data, the missing hours might also have contributed to the discrepancy between the two data sources. In some situations, because of our inability to gain access to the exact location of a government monitoring station, the Ogawa samplers were placed on the gate to the building on which the government monitoring station was placed on top. This might also have contributed to the discrepancy between the two data sources.

We further averaged NO<sub>2</sub> and NO<sub>x</sub> concentrations for the dry and wet seasons to represent annual concentrations measured at those saturation monitoring sites. This procedure is valid given that measurements for each policy period in each region were selected after reviewing historical long-term government monitoring data with the goal that these two 2-week monitoring would allow us to estimate long-term average concentrations most accurately. Our research did show that the average of dry and wet season concentrations in a sampling period was close to the annual concentrations measured at those sites (Su et al. 2016).

Table A2-1. Historical Ogawa samplings conducted in California and agreement with collocated government sites

| Region      | Policy Period | Year | Month     | Pollutants      | Sample size | Collocated sites | Correlation coefficient |
|-------------|---------------|------|-----------|-----------------|-------------|------------------|-------------------------|
| Alameda     | Pre-policy    | 2004 | November  | NO <sub>2</sub> | 51          | 3                | 0.88                    |
|             |               | 2005 | May       | NO <sub>2</sub> | 48          | 3                | 0.72                    |
|             | Post-policy   | 2012 | October   | NO <sub>2</sub> | 49          | 4                | 0.93                    |
|             |               |      |           | NO <sub>x</sub> | 49          | 4                | 0.98                    |
|             |               | 2013 | March     | NO <sub>2</sub> | 49          | 4                | 0.69                    |
|             |               |      |           | NO <sub>x</sub> | 49          | 4                | 0.94                    |
| Los Angeles | Pre-policy    | 2006 | September | NO <sub>2</sub> | 198         | 10               | 0.90                    |
|             |               |      |           | NO <sub>x</sub> | 198         | 10               | 0.94                    |
|             |               | 2007 | February  | NO <sub>2</sub> | 195         | 12               | 0.81                    |
|             |               |      |           | NO <sub>x</sub> | 195         | 12               | 0.97                    |
|             | Post-policy   | 2012 | October   | NO <sub>2</sub> | 70          | 12               | 0.91                    |
|             |               |      |           | NO <sub>x</sub> | 70          | 12               | 0.92                    |
|             |               | 2013 | March     | NO <sub>2</sub> | 72          | 8                | 0.90                    |
|             |               |      |           | NO <sub>x</sub> | 72          | 8                | 0.88                    |

## LUR modeling distance decay curves and surfaces for NO<sub>2</sub>

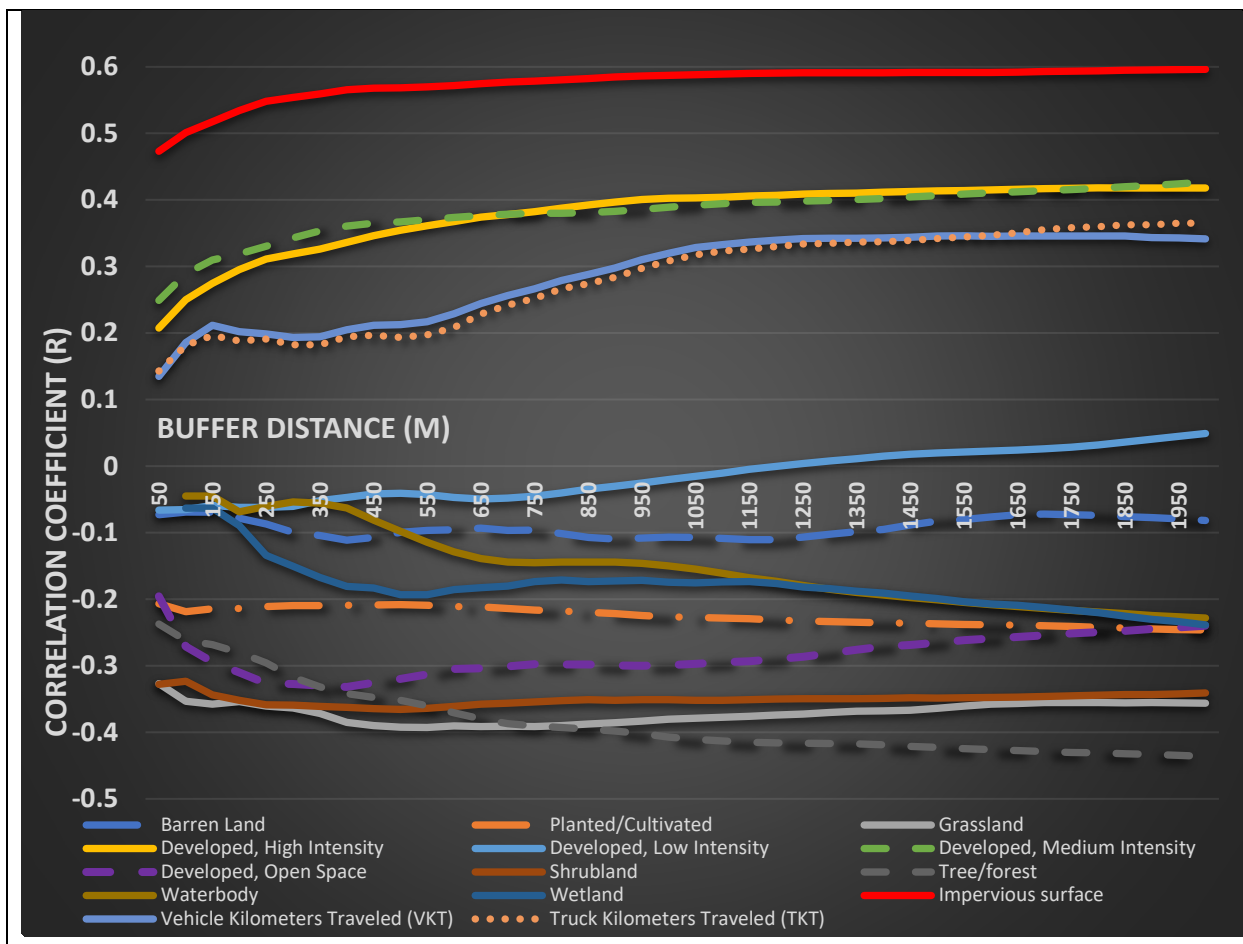

Figure A2-2. The distance curve of correlation with NO<sub>2</sub> for potential predictors in the LUR modeling process. (From [Su et al. 2020](#); licensed under [CC-BY-NC-ND 4.0.](#))

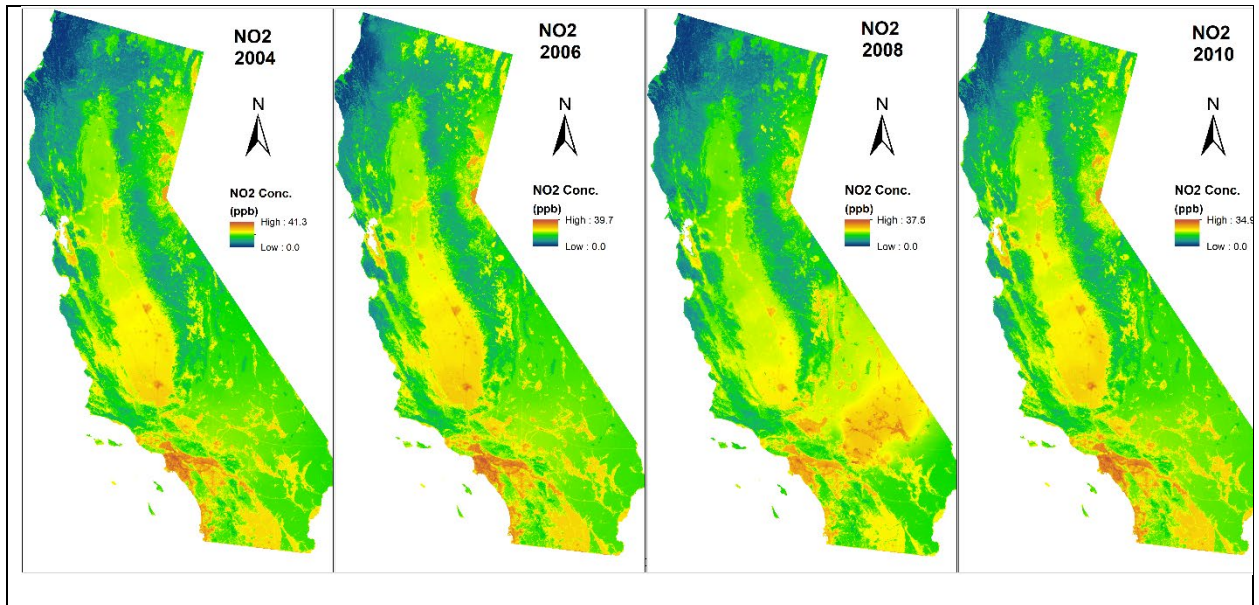

Figure A2-3. Selected years of predicted NO<sub>2</sub> surfaces across California.

### LUR modeling distance decay curves and surfaces for PM<sub>2.5</sub>

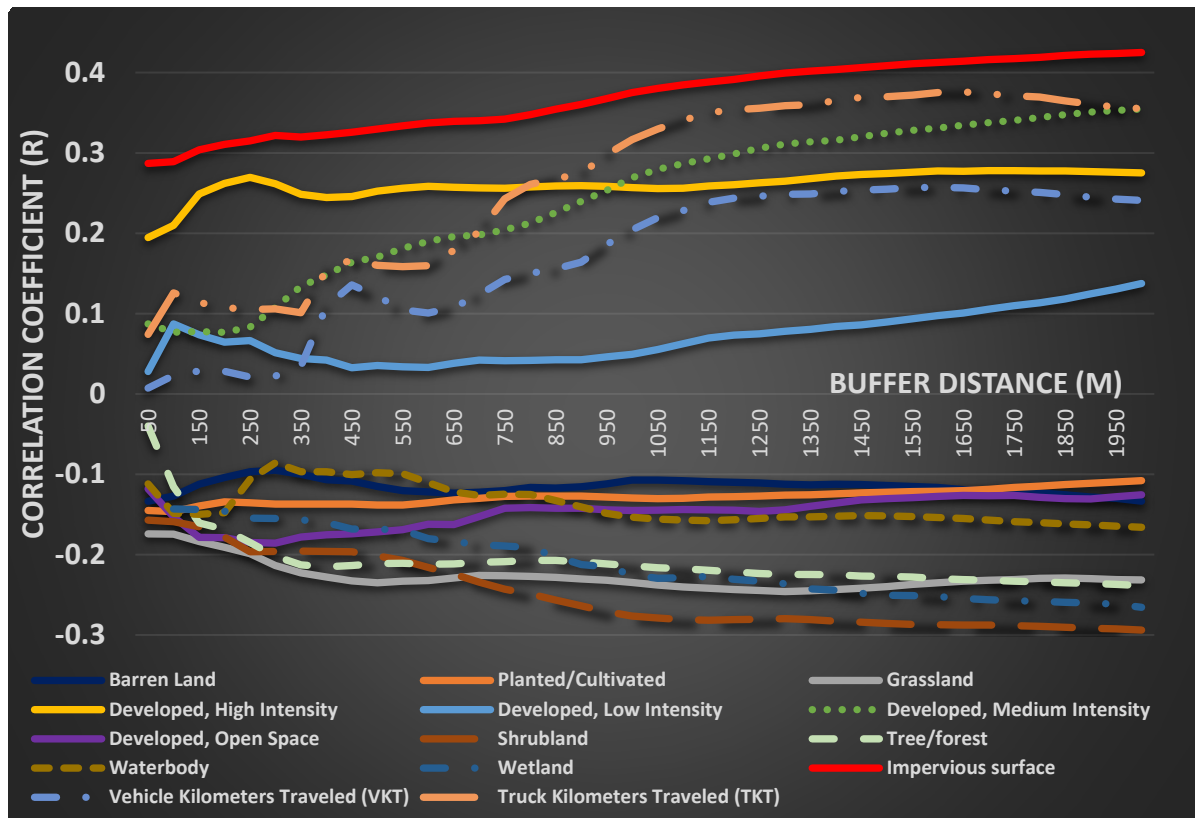

Figure A2-4. The distance curve of correlation with PM<sub>2.5</sub> for potential predictors in the LUR modeling process.

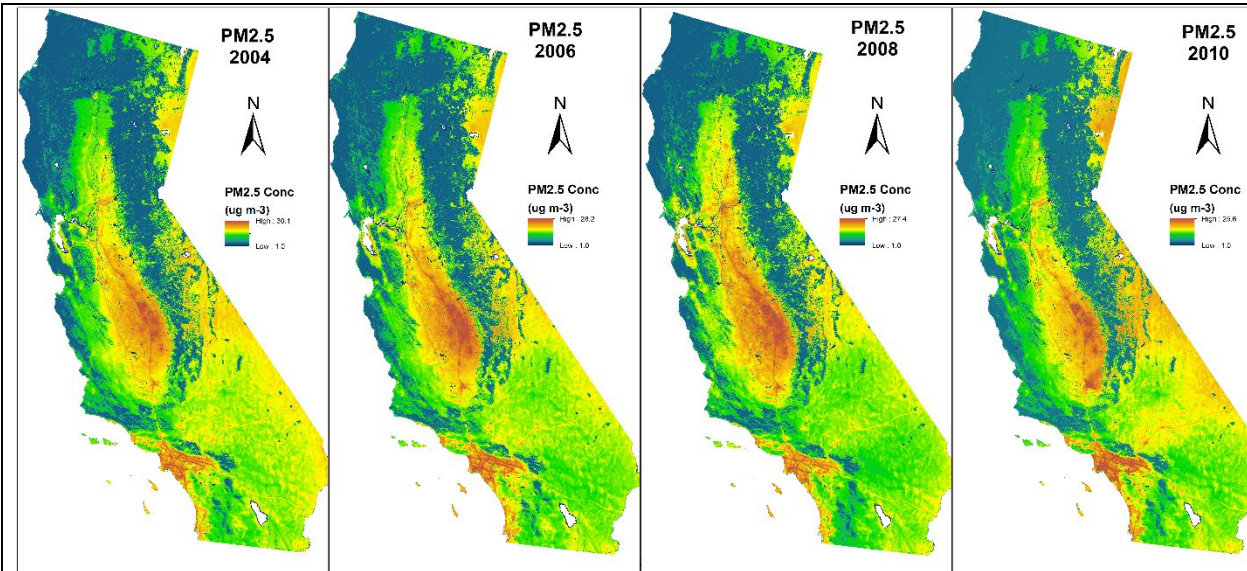

Figure A2-5. Selected years of predicted PM<sub>2.5</sub> surfaces across California.

## Appendix 3: Improvements in Air Pollution Concentrations and Health Effects Air Pollution Concentration Reductions

We observed significant reductions in pollutant concentrations for enrollees living in 10 counties based on the pre- and post-policy averages for NO<sub>2</sub> and PM<sub>2.5</sub> using the annual air pollution surfaces developed for years 2004-2010. Table A3-1 displays average NO<sub>2</sub> and PM<sub>2.5</sub> concentration levels among study subjects for the pre-policy and post-policy periods summarized by domain. The average NO<sub>2</sub> concentrations decreased (in ppb), from 24.0 to 19.3, from 22.4 to 18.7, and from 20.1 to 17.3 for those living in GMC, NGMC, and CTRL areas, respectively. The enrollees living in GMCs for NO<sub>2</sub> experienced the greatest reductions in concentration. Their levels approached those of NGMCs and CTRLS in the post-policy periods.

Table A3-1. Average NO<sub>2</sub>, PM<sub>2.5</sub>, and O<sub>3</sub> Levels among by Study Domain by Year

|                                   |      | NO <sub>2</sub> (ppb) |         |         | PM <sub>2.5</sub> (µg m <sup>-3</sup> ) |         |         | O <sub>3</sub> (ppb) |       |       |
|-----------------------------------|------|-----------------------|---------|---------|-----------------------------------------|---------|---------|----------------------|-------|-------|
|                                   |      | GMC                   | NGMC    | CTRL    | GMC                                     | NGMC    | CTRL    | GMC                  | NGMC  | CTRL  |
| Baseline year                     | 2005 | 24.0                  | 22.4    | 20.1    | 13.9                                    | 12.9    | 12.3    | 43.8                 | 45.5  | 50.8  |
|                                   | 2006 | 23.7                  | 22.0    | 19.6    | 13.9                                    | 12.9    | 12.3    | 45.3                 | 47.0  | 52.0  |
|                                   | 2007 | 22.8                  | 21.1    | 18.9    | 13.8                                    | 12.9    | 12.4    | 44.3                 | 46.0  | 51.4  |
| Project year                      | 2008 | 20.7                  | 20.0    | 19.0    | 14.2                                    | 13.4    | 12.9    | 44.5                 | 46.3  | 51.3  |
|                                   | 2009 | 20.4                  | 19.7    | 18.6    | 12.5                                    | 11.6    | 11.0    | 45.3                 | 47.0  | 51.6  |
|                                   | 2010 | 19.3                  | 18.7    | 17.3    | 11.8                                    | 10.9    | 10.4    | 44.5                 | 46.2  | 50.8  |
| Percentage change (2005 vs. 2010) |      | -19.58%               | -16.52% | -13.93% | -15.11%                                 | -15.50% | -15.45% | 1.60 %               | 1.54% | 0.00% |



Table A3-2. Difference-in-Differences Estimates for Ozone (ppb) between GMCs and CTRLs, GMCs and NGMCs; NGMCs and CTRLs

|                                        | GMCs and CTRLs            |         | GMCs and NGMCs            |         | NGMCs and CTRLs           |         |
|----------------------------------------|---------------------------|---------|---------------------------|---------|---------------------------|---------|
|                                        | DiD (95% CI) <sup>a</sup> | P-value | DiD (95% CI) <sup>a</sup> | P-value | DiD (95% CI) <sup>a</sup> | P-value |
| <b>All Patients</b>                    |                           |         |                           |         |                           |         |
| Post 3 <sup>rd</sup> Year <sup>b</sup> | 0.59 (0.53,0.64)          | <0.01   | 0.01 (-0.03,0.06)         | 0.60    | 0.58 (0.53,0.62)          | <0.01   |
| Post 2 <sup>nd</sup> Year <sup>b</sup> | 0.59 (0.53,0.64)          | <0.01   | 0.00 (-0.04,0.05)         | 0.84    | 0.58 (0.54,0.63)          | <0.01   |
| Post 1 <sup>st</sup> Year <sup>b</sup> | 0.08 (0.02,0.14)          | <0.01   | -0.09 (-0.14,-0.05)       | <0.01   | 0.17 (0.13,0.22)          | <0.01   |
| <b>Asthma Patients</b>                 |                           |         |                           |         |                           |         |
| Post 3 <sup>rd</sup> Year <sup>b</sup> | 0.60 (0.50,0.69)          | <0.01   | -0.01 (-0.09,0.06)        | 0.75    | 0.61 (0.53,0.69)          | <0.01   |
| Post 2 <sup>nd</sup> Year <sup>b</sup> | 0.57 (0.48,0.66)          | <0.01   | -0.01 (-0.09,0.07)        | 0.76    | 0.58 (0.50,0.66)          | <0.01   |
| Post 1 <sup>st</sup> Year <sup>b</sup> | -0.01 (-0.10,0.09)        | <0.01   | -0.16 (-0.23,-0.08)       | <0.01   | 0.15 (0.07,0.23)          | <0.01   |
| <b>COPD Patients</b>                   |                           |         |                           |         |                           |         |
| Post 3 <sup>rd</sup> Year <sup>b</sup> | 0.73 (0.63,0.82)          | <0.01   | 0.06 (-0.01,0.14)         | 0.11    | 0.66 (0.58,0.75)          | <0.01   |
| Post 2 <sup>nd</sup> Year <sup>b</sup> | 0.56 (0.46,0.65)          | <0.01   | 0.00 (-0.08,0.07)         | 0.97    | 0.56 (0.48,0.64)          | <0.01   |
| Post 1 <sup>st</sup> Year <sup>b</sup> | 0.12 (0.03,0.22)          | <0.01   | -0.11 (-0.18,-0.03)       | <0.01   | 0.23 (0.15,0.31)          | <0.01   |
| <b>Diabetes Patients</b>               |                           |         |                           |         |                           |         |
| Post 3 <sup>rd</sup> Year <sup>b</sup> | 0.52 (0.45,0.59)          | <0.01   | 0.02 (-0.04,0.08)         | 0.45    | 0.50 (0.43,0.56)          | <0.01   |
| Post 2 <sup>nd</sup> Year <sup>b</sup> | 0.60 (0.52,0.67)          | <0.01   | 0.01 (-0.05,0.07)         | 0.81    | 0.59 (0.53,0.65)          | <0.01   |
| Post 1 <sup>st</sup> Year <sup>b</sup> | 0.07 (-0.01,0.14)         | 0.07    | -0.10 (-0.16,-0.04)       | <0.01   | 0.17 (0.11,0.23)          | <0.01   |
| <b>Heart Disease Patients</b>          |                           |         |                           |         |                           |         |
| Post 3 <sup>rd</sup> Year <sup>b</sup> | 0.54 (0.45,0.63)          | <0.01   | 0.04 (-0.03,0.11)         | 0.31    | 0.51 (0.43,0.58)          | <0.01   |
| Post 2 <sup>nd</sup> Year <sup>b</sup> | 0.46 (0.37,0.55)          | <0.01   | -0.01 (-0.08,0.06)        | 0.72    | 0.47 (0.40,0.55)          | <0.01   |
| Post 1 <sup>st</sup> Year <sup>b</sup> | 0.12 (0.03,0.21)          | 0.01    | -0.08 (-0.16,-0.01)       | 0.02    | 0.20 (0.13,0.28)          | <0.01   |

<sup>a</sup> The model adjusted for age groups, sex, race/ethnicity, language speaking, number of comorbidities in baseline years, the county, year-specific smoking, depression, number of doctor visits, and CDPS scores, plus census track-level SVI variables: percent of unemployed (age 16+), persons below poverty estimates, minority, and households with no vehicle available.

<sup>b</sup> Numbers are difference-in-differences (DiD) estimates comparing changes between corridors each post-policy year vs. the baseline years (3 years before the implementation of GM actions. Post- 3<sup>rd</sup> Year denotes the policy effect three years after GM actions. 95% CI entries refer to 95% confidence intervals.

---

## Health Effects Results

Table A3-3. Percent Change for ER Visits between GMCs and CTRLs

|                             | Percent Change (%) | 95% Confidence Intervals |
|-----------------------------|--------------------|--------------------------|
| <i>Patients with Asthma</i> |                    |                          |
| Third year effect           | -14.8              | (-24.0, -4.4)            |
| Second year effect          | -11.8              | (-21.4, -1.1)            |
| First year effect           | -7.8               | (-17.8, 3.3)             |
| <i>Patients with COPD</i>   |                    |                          |
| Third year effect           | -11.8              | (-21.2, -1.2)            |
| Second year effect          | -6.9               | (-16.9, 4.3)             |
| First year effect           | -5.5               | (-15.5, 5.7)             |

---

Notes: Numbers are percent changes comparing the number of ER visits between GMCs and CTRLs before and after the GM Actions. Third-year effect denotes the policy effect three years after GM actions.

---

Table A3-4. DiD Estimates for ER Visits with Additional Control for Air Pollutants (NO<sub>2</sub>, PM<sub>2.5</sub>, and O<sub>3</sub>) between GMCs and CTRLs, GMCs and NGMCs; NGMCs and CTRLs

|                                        | GMCs and CTRLs            |         | GMCs and NGMCs            |         | NGMCs and CTRLs           |         |
|----------------------------------------|---------------------------|---------|---------------------------|---------|---------------------------|---------|
|                                        | DiD (95% CI) <sup>a</sup> | P-value | DiD (95% CI) <sup>a</sup> | P-value | DiD (95% CI) <sup>a</sup> | P-value |
| <b>All Patients</b>                    |                           |         |                           |         |                           |         |
| Post 3 <sup>rd</sup> Year <sup>b</sup> | -0.02 (-0.08,0.04)        | 0.53    | 0.02 (-0.03,0.08)         | 0.40    | -0.04 (-0.09,0.01)        | 0.10    |
| Post 2 <sup>nd</sup> Year <sup>b</sup> | -0.04 (-0.10,0.02)        | 0.16    | -0.04 (-0.09,0.02)        | 0.18    | 0.00 (-0.05,0.05)         | 0.88    |
| Post 1 <sup>st</sup> Year <sup>b</sup> | -0.02 (-0.08,0.05)        | 0.62    | -0.01 (-0.06,0.04)        | 0.72    | 0.00 (-0.05,0.05)         | 0.86    |
| <b>Asthma Patients</b>                 |                           |         |                           |         |                           |         |
| Post 3 <sup>rd</sup> Year <sup>b</sup> | -0.17 (-0.29,-0.05)       | 0.01    | 0.00 (-0.11,0.10)         | 0.95    | -0.16 (-0.26,-0.06)       | <0.01   |
| Post 2 <sup>nd</sup> Year <sup>b</sup> | -0.17 (-0.29,-0.06)       | <0.01   | -0.06 (-0.17,0.04)        | 0.22    | -0.11 (-0.20,-0.01)       | 0.03    |
| Post 1 <sup>st</sup> Year <sup>b</sup> | -0.09 (-0.21,0.03)        | 0.13    | -0.05 (-0.16,0.05)        | 0.32    | -0.04 (-0.14,0.06)        | 0.45    |
| <b>COPD Patients</b>                   |                           |         |                           |         |                           |         |
| Post 3 <sup>rd</sup> Year <sup>b</sup> | -0.18 (-0.30,-0.05)       | 0.01    | -0.08 (-0.19,0.03)        | 0.14    | -0.10 (-0.20,0.01)        | 0.08    |
| Post 2 <sup>nd</sup> Year <sup>b</sup> | -0.13 (-0.25,0.00)        | 0.04    | -0.06 (-0.17,0.04)        | 0.25    | -0.06 (-0.17,0.04)        | 0.23    |
| Post 1 <sup>st</sup> Year <sup>b</sup> | -0.08 (-0.21,0.05)        | 0.21    | -0.05 (-0.15,0.06)        | 0.38    | -0.03 (-0.14,0.07)        | 0.52    |
| <b>Diabetes Patients</b>               |                           |         |                           |         |                           |         |
| Post 3 <sup>rd</sup> Year <sup>b</sup> | -0.02 (-0.10,0.06)        | 0.61    | 0.04 (-0.03,0.10)         | 0.28    | -0.05 (-0.12,0.01)        | 0.09    |
| Post 2 <sup>nd</sup> Year <sup>b</sup> | -0.01 (-0.08,0.07)        | 0.81    | -0.04 (-0.11,0.02)        | 0.20    | 0.04 (-0.02,0.10)         | 0.24    |
| Post 1 <sup>st</sup> Year <sup>b</sup> | 0.02 (-0.06,0.09)         | 0.67    | -0.02 (-0.08,0.05)        | 0.57    | 0.03 (-0.03,0.10)         | 0.27    |
| <b>Heart Disease Patients</b>          |                           |         |                           |         |                           |         |
| Post 3 <sup>rd</sup> Year <sup>b</sup> | -0.01 (-0.12,-0.10)       | 0.88    | 0.00 (-0.09,0.09)         | 0.95    | 0.00 (-0.09,0.08)         | 0.96    |
| Post 2 <sup>nd</sup> Year <sup>b</sup> | -0.06 (-0.16,0.05)        | 0.29    | -0.05 (-0.14,0.04)        | 0.24    | 0.00 (-0.08,0.08)         | 0.94    |
| Post 1 <sup>st</sup> Year <sup>b</sup> | 0.00 (-0.11,-0.10)        | 0.96    | -0.02 (-0.11,0.07)        | 0.69    | 0.02 (-0.06,0.11)         | 0.59    |

<sup>a</sup> The model adjusted for age groups, sex, race/ethnicity, language speaking, number of comorbidities in baseline years, the county, year-specific smoking, depression, number of doctor visits, and CDPS scores, plus census tract-level SVI variables: percent of unemployed (age 16+), persons below poverty estimates, minority, and households with no vehicle available. **In addition, the model controlled for NO<sub>2</sub>, PM<sub>2.5</sub>, and O<sub>3</sub>.**

<sup>b</sup> Numbers are difference-in-differences (DiD) estimates comparing changes between corridors each post-policy year vs. the baseline years (3 years before the implementation of GM actions. Post- 3<sup>rd</sup> Year denotes the policy effect three years after GM actions. 95% CI entries refer to 95% confidence intervals.

Table A3-5. Difference-in-Differences Estimates with Lag of CDPS between GMCs and CTRLs for ER Visits and Hospitalizations

|                           | ER Admissions             |         | Hospitalizations          |         |
|---------------------------|---------------------------|---------|---------------------------|---------|
|                           | DiD (95% CI) <sup>a</sup> | P-Value | DiD (95% CI) <sup>a</sup> | P-Value |
| <b>All Patients</b>       |                           |         |                           |         |
| Post 3 <sup>rd</sup> Year | -0.03 (-0.10,0.04)        | 0.40    | 0.00 (-0.03,0.03)         | 0.95    |
| Post 2 <sup>nd</sup> Year | -0.06 (-0.12,0.01)        | 0.10    | -0.02 (-0.06,0.01)        | 0.14    |
| Post 1 <sup>st</sup> Year | -0.03 (-0.09,0.04)        | 0.41    | 0.00 (-0.03,0.03)         | 0.99    |
| <b>Asthma Patients</b>    |                           |         |                           |         |
| Post 3 <sup>rd</sup> Year | -0.17 (-0.30,-0.04)       | 0.01    | -0.02 (-0.08,0.04)        | 0.49    |
| Post 2 <sup>nd</sup> Year | -0.18 (-0.31,-0.05)       | 0.01    | -0.06 (-0.12,0.00)        | 0.04    |
| Post 1 <sup>st</sup> Year | -0.09 (-0.22,0.03)        | 0.15    | 0.00 (-0.05,0.06)         | 0.93    |
| <b>COPD Patients</b>      |                           |         |                           |         |
| Post 3 <sup>rd</sup> Year | -0.18 (-0.32,-0.04)       | 0.01    | 0.01 (-0.06,0.08)         | 0.76    |
| Post 2 <sup>nd</sup> Year | -0.13 (-0.27,0.00)        | 0.06    | -0.03 (-0.09,0.04)        | 0.44    |
| Post 1 <sup>st</sup> Year | -0.09 (-0.23,0.05)        | 0.21    | 0.00 (-0.07,0.06)         | 0.89    |
| <b>Diabetes Patients</b>  |                           |         |                           |         |
| Post 3 <sup>rd</sup> Year | -0.04 (-0.12,0.04)        | 0.35    | 0.01 (-0.03,0.06)         | 0.61    |
| Post 2 <sup>nd</sup> Year | -0.04 (-0.12,0.04)        | 0.37    | -0.02 (-0.06,0.02)        | 0.37    |
| Post 1 <sup>st</sup> Year | -0.02 (-0.11,0.06)        | 0.58    | 0.01 (-0.03,0.05)         | 0.65    |
| <b>Heart Disease</b>      |                           |         |                           |         |
| Post 3 <sup>rd</sup> Year | -0.03 (-0.15,0.09)        | 0.66    | -0.01 (-0.07,0.05)        | 0.75    |
| Post 2 <sup>nd</sup> Year | -0.09 (-0.20,0.03)        | 0.15    | -0.02 (-0.09,0.04)        | 0.46    |
| Post 1 <sup>st</sup> Year | -0.05 (-0.17,0.06)        | 0.37    | -0.01 (-0.07,0.05)        | 0.69    |

Table A3-6. Parallel Trends Assumption for ER Visits in Pre-Policy Period

|                          | Patients with Asthma  | Patients with COPD    |
|--------------------------|-----------------------|-----------------------|
| $\lambda$ : GMC          | 0.3647***<br>(0.0739) | 0.2978***<br>(0.0740) |
| $\beta_2$ : t=2          | -0.0153<br>(0.0532)   | -0.0038<br>(0.0536)   |
| $\beta_3$ : t=3          | 0.0777<br>(0.0529)    | 0.0335<br>(0.0538)    |
| $\gamma_2$ : GMC * (t=2) | -0.0070<br>(0.0707)   | 0.0188<br>(0.0699)    |

|                          |                        |                        |
|--------------------------|------------------------|------------------------|
| $\gamma_3$ : GMC * (t=3) | -0.0803<br>(0.0707)    | -0.0698<br>(0.0703)    |
| Constant                 | -1.2058***<br>(0.0581) | -1.1086***<br>(0.0590) |
| Observations             | 11,154                 | 11,181                 |
| Number of groups         | 3,718                  | 3,727                  |

Notes: Estimates are from a multilevel model with a negative binomial distribution and log link function. The first baseline year (t=1) was the reference group. In parentheses are standard errors. \*\*\* p<0.01.

Table A3-7. Percent Change on ER Visits with Full Interactions between GMCs and Year Dummy Variables

|                             | Percent Change % | 95% Confidence Intervals |
|-----------------------------|------------------|--------------------------|
| <i>Patients with Asthma</i> |                  |                          |
| Third year effect           | -17.2            | (-28.0, -4.7)            |
| Second year effect          | -14.3            | (-25.6, -1.4)            |
| First year effect           | -10.4            | (-22.1, 3.1)             |
| <i>Patients with COPD</i>   |                  |                          |
| Third year effect           | -13.8            | (-24.9, -1.1)            |
| Second year effect          | -9.1             | (-20.8, 4.4)             |
| First year effect           | -7.7             | (-19.5, 5.9)             |

Note: Estimates are from a multilevel model including full interactions between GMCs and Year Dummy variables with a negative binomial distribution and log link function.

Table A3-8. Descriptive Statistics (Weighted Sample) after Propensity Score Matching (Baseline Year)

|                | All  |       | Asthma |       | COPD |       |
|----------------|------|-------|--------|-------|------|-------|
|                | GMCs | CTRLs | GMCs   | CTRLs | GMCs | CTRLs |
| Female         | 0.64 | 0.64  | 0.71   | 0.69  | 0.62 | 0.6   |
| English        | 0.33 | 0.34  | 0.39   | 0.41  | 0.4  | 0.4   |
| Age categories |      |       |        |       |      |       |
| 21-45          | 0.17 | 0.17  | 0.23   | 0.24  | 0.16 | 0.17  |
| 46-55          | 0.33 | 0.33  | 0.36   | 0.36  | 0.36 | 0.35  |

|                                      |       |        |       |        |       |       |
|--------------------------------------|-------|--------|-------|--------|-------|-------|
| 56+                                  | 0.49  | 0.5    | 0.41  | 0.4    | 0.48  | 0.47  |
| Race/ethnicity                       |       |        |       |        |       |       |
| White                                | 0.38  | 0.38   | 0.36  | 0.36   | 0.47  | 0.42  |
| African American                     | 0.13  | 0.18   | 0.16  | 0.21   | 0.16  | 0.2   |
| Asian/Pacific Island                 | 0.23  | 0.18   | 0.24  | 0.18   | 0.15  | 0.13  |
| Latino                               | 0.12  | 0.15   | 0.1   | 0.14   | 0.1   | 0.13  |
| Other or Unknown                     | 0.14  | 0.11   | 0.14  | 0.1    | 0.12  | 0.11  |
| Number of comorbidities in 2005-2007 |       |        |       |        |       |       |
| 0                                    | 0.51  | 0.51   | 0.28  | 0.27   | 0.14  | 0.18  |
| 1 or 2                               | 0.46  | 0.46   | 0.63  | 0.64   | 0.76  | 0.74  |
| 3+                                   | 0.03  | 0.03   | 0.09  | 0.09   | 0.09  | 0.09  |
| Smoking in 2005                      | 0.03  | 0.04   | 0.04  | 0.05   | 0.06  | 0.07  |
| Depression in 2005                   | 0.11  | 0.12   | 0.12  | 0.13   | 0.13  | 0.14  |
| Number of doctor visits in 2005      | 5.84  | 6.43   | 6.33  | 6.98   | 6.23  | 7.12  |
| Log (CDPS score)                     | 0.001 | -0.014 | 0.005 | -0.027 | 0.1   | 0.09  |
| % of unemployed (16+)                | 11.18 | 10.42  | 11.5  | 1.07   | 11.08 | 10.6  |
| % of persons below poverty           | 23.2  | 18.18  | 24.3  | 18.95  | 23.12 | 18.37 |
| % of minority                        | 70.14 | 64.31  | 70.86 | 64.52  | 68.86 | 63.67 |
| % of households without vehicle      | 16.92 | 8.88   | 16.98 | 9.04   | 17.07 | 9.21  |
| N                                    | 5,232 | 4,768  | 1,931 | 1,787  | 2,047 | 1,680 |

Table A3-9. Difference-in-Differences Estimates for Hospitalizations; GMCs and CTRLs, GMCs and NGMCs; NGMCs and CTRLs

|                                        | GMCs and CTRLs            |         | GMCs and NGMCs            |         | NGMCs and CTRLs           |         |
|----------------------------------------|---------------------------|---------|---------------------------|---------|---------------------------|---------|
|                                        | DiD (95% CI) <sup>a</sup> | P-value | DiD (95% CI) <sup>a</sup> | P-value | DiD (95% CI) <sup>a</sup> | P-value |
| <b>All Patients</b>                    |                           |         |                           |         |                           |         |
| Post 3 <sup>rd</sup> Year <sup>b</sup> | 0.00 (-0.03,0.03)         | 0.95    | -0.01 (-0.04,0.01)        | 0.34    | 0.01 (-0.01,0.04)         | 0.28    |
| Post 2 <sup>nd</sup> Year <sup>b</sup> | -0.03 (-0.06,0.00)        | 0.06    | -0.01 (-0.03,0.01)        | 0.43    | -0.02 (-0.04,0.01)        | 0.14    |
| Post 1 <sup>st</sup> Year <sup>b</sup> | -0.01 (-0.04,0.02)        | 0.53    | 0.00 (-0.03,0.02)         | 0.83    | -0.01 (-0.03,0.01)        | 0.46    |
| <b>Asthma Patients</b>                 |                           |         |                           |         |                           |         |
| Post 3 <sup>rd</sup> Year <sup>b</sup> | 0.00 (-0.06,0.05)         | 0.94    | -0.01 (-0.05,0.04)        | 0.75    | 0.01 (-0.03,0.05)         | 0.70    |
| Post 2 <sup>nd</sup> Year <sup>b</sup> | -0.04 (-0.08,0.01)        | 0.17    | 0.00 (-0.05,0.04)         | 0.86    | -0.03 (-0.07,0.01)        | 0.15    |
| Post 1 <sup>st</sup> Year <sup>b</sup> | 0.00 (-0.05,0.05)         | 0.99    | -0.01 (-0.05,0.03)        | 0.73    | 0.00 (-0.04,0.04)         | 0.84    |
| <b>COPD Patients</b>                   |                           |         |                           |         |                           |         |
| Post 3 <sup>rd</sup> Year <sup>b</sup> | -0.01 (-0.07,0.05)        | 0.80    | -0.01 (-0.06,0.03)        | 0.55    | 0.01 (-0.04,0.06)         | 0.75    |
| Post 2 <sup>nd</sup> Year <sup>b</sup> | -0.04 (-0.09,0.02)        | 0.19    | -0.01 (-0.05,0.04)        | 0.82    | -0.03 (-0.08,0.01)        | 0.16    |
| Post 1 <sup>st</sup> Year <sup>b</sup> | -0.01 (-0.06,0.04)        | 0.72    | -0.04 (-0.09,0.00)        | 0.05    | 0.03 (-0.01,0.08)         | 0.13    |
| <b>Diabetes Patients</b>               |                           |         |                           |         |                           |         |
| Post 3 <sup>rd</sup> Year <sup>b</sup> | 0.02 (-0.02,0.06)         | 0.36    | -0.02 (-0.06,0.01)        | 0.16    | 0.04 (0.01,0.07)          | 0.01    |
| Post 2 <sup>nd</sup> Year <sup>b</sup> | -0.02 (-0.06,0.02)        | 0.34    | -0.01 (-0.05,0.02)        | 0.46    | 0.00 (-0.04,0.03)         | 0.83    |
| Post 1 <sup>st</sup> Year <sup>b</sup> | 0.01 (-0.03,0.05)         | 0.62    | 0.00 (-0.03,0.03)         | 0.93    | 0.00 (-0.03,0.03)         | 0.84    |
| <b>Heart Disease Patients</b>          |                           |         |                           |         |                           |         |
| Post 3 <sup>rd</sup> Year <sup>b</sup> | -0.02 (-0.08,0.03)        | 0.47    | -0.06 (-0.10,-0.01)       | 0.02    | 0.04 (-0.01,0.08)         | 0.09    |
| Post 2 <sup>nd</sup> Year <sup>b</sup> | -0.04 (-0.09,0.01)        | 0.15    | -0.04 (-0.08, 0.01)       | 0.12    | 0.00 (-0.05,0.04)         | 0.92    |
| Post 1 <sup>st</sup> Year <sup>b</sup> | -0.03 (-0.09,0.02)        | 0.24    | -0.05 (-0.10,-0.01)       | 0.03    | 0.01 (-0.03,0.06)         | 0.56    |

<sup>a</sup> The model adjusted for age groups, sex, race/ethnicity, language speaking, number of comorbidities in baseline years, the county, year-specific smoking, depression, number of doctor visits, and CDPS scores, plus census tract-level SVI variables: percent of unemployed (age 16+), persons below poverty estimates, minority, and households with no vehicle available.

<sup>b</sup> Numbers are difference-in-differences (DiD) estimates comparing changes between corridors each post-policy year vs. the baseline years (3 years before the implementation of GM actions. Post- 3<sup>rd</sup> Year denotes the policy effect three years after GM actions. 95% CI entries refer to 95% confidence intervals.

Table A3-10. DiD Estimates for Hospitalizations with Additional Control for Air Pollutants (NO<sub>2</sub>, PM<sub>2.5</sub>, and O<sub>3</sub>) between GMCs and CTRLs, GMCs and NGMCs; NGMCs and CTRLs

|                                        | GMCs and CTRLs            |         | GMCs and NGMCs            |         | NGMCs and CTRLs           |         |
|----------------------------------------|---------------------------|---------|---------------------------|---------|---------------------------|---------|
|                                        | DiD (95% CI) <sup>a</sup> | P-value | DiD (95% CI) <sup>a</sup> | P-value | DiD (95% CI) <sup>a</sup> | P-value |
| <b>All Patients</b>                    |                           |         |                           |         |                           |         |
| Post 3 <sup>rd</sup> Year <sup>b</sup> | 0.00 (-0.03,0.03)         | 1.00    | -0.01 (-0.04,0.01)        | 0.34    | 0.01 (-0.01,0.04)         | 0.31    |
| Post 2 <sup>nd</sup> Year <sup>b</sup> | -0.03 (-0.06,0.00)        | 0.05    | -0.01 (-0.03,0.01)        | 0.43    | -0.02 (-0.04,0.01)        | 0.13    |
| Post 1 <sup>st</sup> Year <sup>b</sup> | -0.01 (-0.04,0.02)        | 0.55    | 0.00 (-0.03,0.02)         | 0.85    | -0.01 (-0.03,0.01)        | 0.46    |
| <b>Asthma Patients</b>                 |                           |         |                           |         |                           |         |
| Post 3 <sup>rd</sup> Year <sup>b</sup> | 0.00 (-0.06,0.05)         | 0.88    | -0.01 (-0.05,0.04)        | 0.74    | 0.01 (-0.04,0.05)         | 0.77    |
| Post 2 <sup>nd</sup> Year <sup>b</sup> | -0.04 (-0.08,0.01)        | 0.17    | 0.00 (-0.05,0.04)         | 0.86    | -0.03 (-0.07,0.01)        | 0.15    |
| Post 1 <sup>st</sup> Year <sup>b</sup> | 0.00 (-0.05,0.05)         | 0.93    | -0.01 (-0.05,0.04)        | 0.74    | 0.01 (-0.03,0.05)         | 0.80    |
| <b>COPD Patients</b>                   |                           |         |                           |         |                           |         |
| Post 3 <sup>rd</sup> Year <sup>b</sup> | -0.01 (-0.07,0.05)        | 0.75    | -0.01 (-0.06,0.03)        | 0.55    | 0.00 (-0.04,0.05)         | 0.84    |
| Post 2 <sup>nd</sup> Year <sup>b</sup> | -0.04 (-0.09,0.02)        | 0.17    | -0.01 (-0.05,0.04)        | 0.82    | -0.04 (-0.08,0.01)        | 0.14    |
| Post 1 <sup>st</sup> Year <sup>b</sup> | -0.01 (-0.06,0.04)        | 0.74    | -0.04 (-0.09,0.00)        | 0.05    | 0.03 (-0.01,0.08)         | 0.13    |
| <b>Diabetes Patients</b>               |                           |         |                           |         |                           |         |
| Post 3 <sup>rd</sup> Year <sup>b</sup> | 0.02 (-0.02,0.06)         | 0.40    | -0.02 (-0.06,0.01)        | 0.17    | 0.04 (0.01,0.07)          | 0.01    |
| Post 2 <sup>nd</sup> Year <sup>b</sup> | -0.02 (-0.06,0.02)        | 0.31    | -0.01 (-0.04,0.02)        | 0.47    | 0.00 (-0.04,0.03)         | 0.79    |
| Post 1 <sup>st</sup> Year <sup>b</sup> | 0.01 (-0.03,0.05)         | 0.58    | 0.00 (-0.03,0.03)         | 0.91    | 0.00 (-0.03,0.03)         | 0.87    |
| <b>Heart Disease Patients</b>          |                           |         |                           |         |                           |         |
| Post 3 <sup>rd</sup> Year <sup>b</sup> | -0.02 (-0.08,0.03)        | 0.46    | -0.06 (-0.10,-0.01)       | 0.02    | 0.04 (-0.01,0.08)         | 0.10    |
| Post 2 <sup>nd</sup> Year <sup>b</sup> | -0.04 (-0.09,0.01)        | 0.14    | -0.04 (-0.08,0.01)        | 0.12    | 0.00 (-0.05,0.04)         | 0.93    |
| Post 1 <sup>st</sup> Year <sup>b</sup> | -0.03 (-0.09,0.02)        | 0.24    | -0.05 (-0.10,-0.01)       | 0.03    | 0.02 (-0.03,0.06)         | 0.51    |

<sup>a</sup> The model adjusted for age groups, sex, race/ethnicity, language speaking, number of comorbidities in baseline years, the county, year-specific smoking, depression, number of doctor visits, and CDPS scores, plus census tract-level SVI variables: percent of unemployed (age 16+), persons below poverty estimates, minority, and households with no vehicle available.

<sup>b</sup> Numbers are difference-in-differences (DiD) estimates comparing changes between corridors each post-policy year vs. the baseline years (3 years before the implementation of GM actions. Post- 3<sup>rd</sup> Year denotes the policy effect three years after GM actions. 95% CI entries refer to 95% confidence intervals.
